1       **Genetic, morphometric, and molecular analyses of interspecies differences in head**  
2               **shape and hybrid developmental defects in the wasp genus *Nasonia*.**

3    \*Lorna B Cohen, †Rachel Edwards, \*Dyese Moody, \*Deanna Arsala, †Jack H Werren, \*Jeremy  
4    A Lynch

5

6    \*Biological Sciences, University of Illinois at Chicago, Chicago, Illinois 60607

7    †Department of Biology, University of Rochester, Rochester, NY 14627

8

9 **Epistasis of complex traits in hybrids**

10 Keywords: Epistasis, Complex traits, Nasonia, Hybrid compatibility, Morphological development

11

12 Corresponding author:

13 Jeremy Lynch

14 900 South Ashland Ave, Rm 4018

15 Chicago, Illinois, 60607

16 [jlynch42@uic.edu](mailto:jlynch42@uic.edu)

17 312-996-5460

18

19

20

21

22

23

24

25

26  
27  
28  
29  
30  
31  
32  
33  
34  
35  
36  
37  
38  
39  
40  
41  
42  
43  
44  
45  
46  
47  
48

## Abstract

Males in the parasitoid wasp genus *Nasonia* (*N. vitripennis*, *N. giraulti*, *N. longicornis*) have distinct, species specific, head shapes. Fertile hybrids among the species are readily produced in the lab allowing genetic analysis of the evolved differences. In addition, the obligate haploidy of males makes these wasps a uniquely powerful model for analyzing the role of complex gene interactions in development and evolution. Previous analyses have shown that complex gene interactions underpin different aspects of the shape differences, and developmental incompatibilities that are specific to the head in F2 haploid hybrid males are also governed by networks of gene interaction. Here we use the genetic tools available in *Nasonia* to extend our understanding of the gene interactions that affect development and morphogenesis in male heads. Using artificial diploid male hybrids, we show that alleles affecting head shape are codominant, leading to uniform, averaged hybrid F1 diploid male heads, while the alleles mediating developmental defects are recessive, and are not visible in the diploid hybrids. We also determine that divergence in time, rather than in morphological disparity is the primary driver of hybrid developmental defects. In addition, we show that doublesex is necessary for the male head shape differences, but is not the only important factor. Finally we demonstrate that we can dissect complex interspecies gene interaction networks using introgression in this system. These advances represent significant progress in the complex web of gene interactions that govern morphological development, and chart the connections between genomic and phenotypic variation.

## 49 **Introduction**

50 Form develops in large part through the complex action and interaction of differentiating  
51 tissues and cells, and the gene regulatory networks (GRN) acting within them (Davidson *et al.*  
52 2003). Stable changes in form within populations and between species are encoded by changes  
53 in the identity or magnitude of connections within and between developmental GRNs  
54 (Stathopoulos and Levine 2005; Hinman and Davidson 2007). Some interactions are relatively  
55 straightforward, resulting in phenotypes that are near to the expected sum or logical  
56 combination of the effects of the alleles alone in a neutral background. These are termed  
57 additive effects, and are often the result of independent pathways that contribute to a trait. In  
58 contrast, those phenotypes that are significantly different in magnitude and/or sign than the  
59 expected combination of alleles are due to the phenomenon of epistasis (Cheverud and  
60 Routman 1995). Epistasis among alleles is strongly indicative of direct interaction among the  
61 genes involved in producing the epistatic phenotype (Phillips 2008; Werren *et al.* 2016).  
62 Although some studies have argued that nearly all gene interactions are additive (Hill *et al.*  
63 2008), a strong body of literature refute that claim, and even show that apparent additive effects  
64 can result from many underlying epistatic interactions (Avery and Wasserman 1992; Cheverud  
65 and Routman 1995; Huang *et al.* 2012; Jones *et al.* 2014). This discrepancy is likely due to  
66 detection bias, whereby statistical constraints limit testing to pairwise interactions, or search for  
67 quantitative trait loci (QTL) only among regions that show a significant marginal effect (Wolf *et*  
68 *al.* 2000). In fact, much epistasis involves chromosome regions that show little marginal effects,  
69 and three- or four-way interactions are quite common (Templeton *et al.* 1976). Non-biased  
70 epistatic QTL methods face much greater technical challenges than individual QTL mapping  
71 methods, but can be very informative as they simultaneously weigh the mean additive or non-  
72 additive effects on phenotype (Carlborg and Haley 2004).  
73 While these nonlinear genetic interactions complicate the genotype-to-phenotype map, they are  
74 essential in generating complex and quantitative traits. Knowledge of epistatic interactions will

75 deepen our understanding of complex traits, how they are encoded in the genome, and how  
76 they evolve (Mackay 2014). Thus investigating developmental GRNs is crucial to understand  
77 the genetic basis of form (Phillips 2008). The head is perhaps the most complex morphological  
78 feature of the bilaterian body plan. Considerable developmental challenges in patterning and  
79 development are encountered as several major sensory organs arise from a common  
80 primordium, like the eye-antennal disc, (Domínguez and Casares 2005; Palliyil *et al.* 2018), and  
81 then integrate with other primordia, such the labial disc and gnathal segments (Younossi-  
82 Hartenstein *et al.* 1993).

83         This complexity is reflected in the gene networks underlying head development, and the  
84 complex genetic interactions that participate in head development revealed by the highly  
85 epistatic nature of pathological syndromes in humans and model organisms (Lidral and Moreno  
86 2005; Wolf *et al.* 2005; Gross *et al.* 2014). Since these model systems are standard diploids,  
87 analysis of complex epistatic interactions suffers from the complications of dominance effects  
88 and extremely rapid increase in the number of progeny required to detect gene interactions  
89 (Werren *et al.* 2016). Epistatic interactions among multiple recessive alleles are quite  
90 demanding to detect due to the exponentially increasing rarity of progeny homozygous for the  
91 required alleles at all loci involved. In diploid organisms the rate of obtaining the correct  
92 genotype is  $\frac{1}{4^x}$  for recessive interacting alleles, where x is the number of loci involved in the  
93 producing the epistatic phenotype (Werren *et al.* 2016).

94         Conversely, use of a haploid model system significantly increases the frequency of the  
95 ( $\frac{1}{2^x}$  for haploids vs  $\frac{1}{4^x}$  for diploids) and eliminates interference from dominance effects. The  
96 preceding is a major reason why haplodiploid insects in the genus *Nasonia* show strong  
97 promise as model systems for understanding how epistasis and complex interactions among  
98 alleles in GRNs that affect the evolution of form (Gadau *et al.* 2002; Hoedjes *et al.* 2014). Like  
99 all Hymenoptera, *Nasonia* have haplodiploid genetics, where unfertilized eggs obligate haploid  
100 males, and fertilized eggs become diploid females (Werren and Loehlin 2009). Additionally,

101 *Nasonia* are small insects easily reared in the lab, have short generation times, can be  
102 kept alive under refrigeration for extended periods, have fully annotated genomes, visible and  
103 molecular markers and crucially, the ability to make viable, fertile F1 hybrids between all species  
104 (Werren and Loehlin 2009; Lynch 2015). Furthermore, there are clearly marked morphological  
105 differences between the species, particularly among the haploid males, making evolutionary  
106 genetic analysis possible in *Nasonia* (Beukeboom and Desplan 2003; Werren and Loehlin 2009;  
107 Lynch 2015; Werren *et al.* 2016).

108 The distinctness of male head morphology is particularly apparent in the males of *N.*  
109 *giraulti* (Werren *et al.* 2016), (Figure 1, Figure 2A-E, Table S1). Females of all species of the  
110 genus, and males of *N. vitripennis* have a rounded ovoid face shape. In contrast, *N. giraulti*  
111 male faces are mostly square, with consistent width along the length of the face (Figure 1,  
112 TableS1). The exception to this square-ness is the cheeks, which protrude ventrally, giving  
113 these males a jowly appearance (Werren *et al.* 2016), (Figure 1, Figure 2E, Table S1).

114 In addition to functional hybrid males with mixtures of morphological features found in  
115 the males of the parental species, F2 male hybrid offspring between *N. vitripennis* and *N. giraulti*  
116 display a wide variety abnormal phenotypes (Werren *et al.* 2016). These defects include cranial  
117 midline furrowing, dorsal-ventral asymmetries, and lateral asymmetries (Werren *et al.* 2016).  
118 Preliminary QTL analyses indicate that all of these abnormalities are largely due to epistatic  
119 interactions among alleles of several genes from the two species (Werren *et al.* 2016).

120 Here, we aim to develop a better understanding of the genetic and developmental origin  
121 of the phenotypes we observe between species and among hybrids. Our analyses address  
122 several outstanding questions about the nature of the head patterning GRNs of the two species  
123 and how alleles interact to produce different hybrid phenotypes by combining interspecies  
124 crosses, RNA interference, and cross-species introgression analyses. Questions we address  
125 include: 1) Are development defects in hybrid F2 males correlated with divergence time  
126 between the species or with degree of morphological divergence? 2) Are the defects due to

127 general developmental instability or to disruption of gene interactions specific to the head? 3)  
128 Are the defects primarily due to the exposure of allelic incompatibilities in haploids, or are there  
129 dominant alleles involved in the formation of novel structures and shapes arising between the  
130 species? We also address the dominance relationships among alleles affecting head shape and  
131 the developmental defects observed in hybrid males.  
132

133 **Materials and Methods**

134 **Hybrid crosses**

135           Wolbachia-free and highly inbred strains of *N. vitripennis* (AsymCx), *N. giraulti*, (RV2x)  
136 and *N. longicornis* (IV7) (Werren *et al.* 2010) were used to make hybrids. For each cross a ratio  
137 of fifteen females to nine males were allowed 24 hours to mate before provided fly hosts to  
138 parasitize. Fifteen to twenty F1 hybrid virgin females from each interspecies cross were then  
139 provided hosts to parasitize. Setting females as virgins guarantees all offspring to be haploid  
140 males.

141

142 **Measurements**

143           Heads from male hybrids were stained, mounted and imaged as outlined by Werren *et*  
144 *al.* 2016. Measurements were taken in Imaris7.1.1 according to parameters also outlined in  
145 Werren *et al.* 2016. Acronyms are as follows: MHW- maximum head width, HL- head length,  
146 OIO- interocular distance through ocelli, MIO- maximum interocular distance, AIO- interocular  
147 distance across antennal sockets, FE- distance from bottom of eye to center of mandible, FEP-  
148 farthest point on cheek perpendicular to line FE (see Figure S1 for diagram). Measurements are  
149 presented as ratios to normalize natural difference in overall size of the individual. MHW, OIO,  
150 MIO and AIO are normalized in relation to head length (HL) and dividing FEP by FE normalizes  
151 cheek size. Mann-Whitney U tests were performed for nonparametric data between two groups,  
152 and Bonferroni adjustments made for multiple comparisons. For wild type parent species,  
153 comparisons were made among males of each species, among females of each species, and  
154 between males and females within each species. Each experimental group was compared  
155 individually to *N. vitripennis* and *N. giraulti* wild type males. Plots were generated using R (R  
156 Core Team 2013), raw averages, standard deviations and significance can be found in Tables  
157 S1 and S3.

158



159 **Analyses of symmetry**

160 **Heads**

161 Head symmetry was measured by Procrustes distance analysis of 105 hybrid male heads as  
162 well as 72 wild types (30 *N. vitripennis* and 28 *N. giraulti* of equal males and females). Each  
163 head was marked at 16 landmarks: One at each ocellus, at the tops and bottoms of each eye, at  
164 the maximum arc of each eye, the maximum arc of each cheek, the center point of the  
165 mandible, both ends of the MIO, and location of each antennal socket (Figure S1). Landmarks  
166 were established three times for each head and coordinates for each landmark were averaged  
167 and imported as an array in R (R Core Team 2013). Scaling, rotating and superimposition of  
168 head landmarks was carried out using R packages geomorph, shapes and Momocs (Bonhomme  
169 *et al.* 2014; Adams *et al.* 2017; Dryden 2017). R package vegan (Oksanen *et al.* 2017)  
170 quantifies symmetry by overlaying the left and right sides of heads and performs Procrustes  
171 distance analyses, defined as  $\Sigma((\text{distance between corresponding landmarks})^2)$ .

172 **Legs and wings**

173 Front wings and T1 legs of the same 105 hybrid and 72 wild type wasps were carefully removed  
174 and mounted on slides. Each wing and leg was imaged on a Zeiss Stereo Discovery V.8  
175 dissecting scope using Zeiss Axiovision software v. 4.8. Each specimen was measured three  
176 times and the length averaged. The difference in length between left and right sides of each  
177 appendage was compared for hybrids and wild types.

178

179 **RNAi**

180 **Diploid males**

181 To generate diploid males, we used parental RNAi (Lynch and Desplan 2006) on a mutant  
182 strain of *N. vitripennis* with grey eye color (*N.vit<sup>Oy/Oy</sup>*). Female yellow pupae of *N.vit<sup>Oy/Oy</sup>* were  
183 injected with 1ug/ul of double-stranded RNA (dsRNA) targeting *Nv-transformer* (*Nv-tra*), whose  
184 function is required for female development in fertilized eggs (Verhulst *et al.* 2010). The injected

185 *N. vit<sup>Oy/Oy</sup>* adult females were then crossed to the wild type *N. giraulti* (RV2x), which have a red-  
186 brown eye color. While haploid males display the grey eye phenotype, the hybrid, diploid males  
187 express wild type red-brown eye color allele obtained from the *N. giraulti* parent. Male vs female  
188 offspring are easily differentiated in the pupal state by wing size and absence/presence of an  
189 ovipositor (Werren and Loehlin 2009).

190 Primer Sequences (Arsala and Lynch 2017):

191 *Nv*-Transformer-F: ggccgcgggcaaaatccgtgagacaac

192 *Nv*-Transformer-R: cccggggcgaggctgtcggcaaaaata

193 **Dsx**

194 Knockdown of *N. giraulti doublesex* (*Ng-dsx*) was carried out by injecting *N. giraulti* larvae with  
195 dsRNA targeted to *Ng-dsx* according to (Werren *et al.* 2009). Mid-stage larvae collected ~8  
196 days after egg lay were positioned on double-sided tape on a slide for injection. Larvae were  
197 returned to 25° incubator to eclosion. Adult heads were stained, imaged and measured as  
198 described above.

199 *Ng*-Doublesex-F: ggccgcggcgcggaagttgaagaagtc

200 *Ng*-Doublesex-R: cccggggcaatccaagtcccacatctgc

201

202 **Introgression**

203 Introgression of *Ng* chromosomal regions into an *Nv* genetic background is routinely used to  
204 investigate the genetic basis of differences in traits between the species, and some cases for  
205 positional cloning of causal loci . We generated an *Ng* introgression into *Nv* of a region on  
206 chromosome 2 implicated in abnormal head clefting in F2 males (Werren *et al.* 2016). The initial  
207 chromosome 2 introgression line is designated INT\_2C, and head shape effects were observed,  
208 in addition to phenotypic effects on body color, survival and female fertility (data not shown).  
209 Subsequent recombinants were generated by using primers flanking insertion/deletion  
210 differences across the region. A smaller scale introgression designated 2C-Cli was produced

211 that shows an abnormal head clefting in both males and females. The recessive lethal and  
212 female fertility effects were separated from the clefting region by recombination. Both  
213 introgression lines were generated according to methods described in Breeuwer and Werren,  
214 1995. The smaller region is estimated to be 16 centimorgan based on the map in Desjardins *et*  
215 *al.* 2013. The line with an introgression on chromosome four (denoted INT\_wm114) was  
216 generated to study the sex-specific gene size differences in *Nasonia* (Loehlin *et al.* 2010). Adult  
217 heads were stained, imaged and measured as described above.

218

### 219 **Data Accessibility**

220 Strains are available upon request. Figure S1 shows how heads were measured. Table S1  
221 provides the raw measurements of the parental species heads. Table S2 gives the  
222 measurements of the wings and legs of parental species and hybrid wasps. Table S3 provides  
223 the measurements of the experimental strain heads. Table S4 provides a side by side  
224 comparison of the measurements of parental and experimental heads. The authors affirm that  
225 all data necessary for confirming the conclusions of the article are present within the article,  
226 figures, and tables.

227

## 228 **Results**

### 229 **Wild type males have species-specific morphologies**

230 The significant differences in head shape between the males of *N. vitripennis* and *N. giraulti*  
231 were described in Werren *et al.* 2016, and a general description of *N. vitripennis*, *N. giraulti*, and  
232 *N. longicornis* heads was provided in Darling and Werren, 1990. To understand how head  
233 shape has evolved in the *Nasonia* genus, we examined head shape of the males and females in  
234 more detail. To this end, we took seven measurements (Figure S1) on several heads (n=12-20,  
235 Table S1) from both males and females of the three species we investigate here. These  
236 measurements include maximal head width, head length, facial width in three places, and cheek  
237 size.

238 General head shape measurements were normalized by dividing the measurement by  
239 the head length to consistently control for variation in head size. Cheek size measurements are  
240 expressed as ratios with another measurement of head size to normalize for natural size  
241 variation across individuals and since females tend to be larger than males. Upon comparing  
242 measurement ratios, we found that *N. vitripennis*, *N. giraulti* and *N. longicornis* females all have  
243 roughly the same oval shape in their faces (Figure 1A', B', C', D', Figure 2B-D), with *N. giraulti*  
244 females having the least round shape (Figure 2C). Males on the other hand, all look quite  
245 different (Figure 1A, B, C, D). The males of *N. vitripennis* look nearly the same as that of the  
246 females (Figure 1A-A'), but are actually wider at maximum head width (MHW) and maximum  
247 interocular distance (MIO) (Figure 2A and C). The males of *N. giraulti* (Figure 1B) appear much  
248 more square due to their consistency in the three normalized face width measurements: across  
249 ocelli (OIO), across antennae (AIO), and MIO (Figure 2B-D, Table S1). Male heads of *N.*  
250 *longicornis* (Figure 1C), were previously described to be similar to *N. vitripennis* males and  
251 females (Darling and Werren 1990), but actually measure more similar to *N. giraulti* in terms of  
252 face shape at measurements MHW, OIO and AIO (Figure 2A, B, D, Table S1). Additionally, *N.*

253 *longicornis* males are almost exactly intermediate between the other two species in cheek size  
254 (FEP/FE) (Figure 1D, Figure 2E, Table S1).

255         Also interesting to note is that a few traits are partially sex specific. For example,  
256 females of *N. giraulti* and *N. longicornis* do have bigger cheeks than *N. vitripennis*, but the  
257 males traits are extreme (Figure 2E). This implies incomplete sex specificity of the shape  
258 differences between species, and that some genes responsible for the extreme male differences  
259 also affect female development. Similar phenotypes appear to exist at the interocular width at  
260 the top and bottom of the head, OIO and AIO, where both male and female *N. giraulti* and *N.*  
261 *longicornis* have relatively narrower faces than the *N. vitripennis* counterparts, but again the  
262 male trait difference are more exaggerated. Overall conclusions from wild type species shape  
263 analyses is that females across the three species have roughly the same shape except for  
264 maximum head width, intraspecies sex-specific differences are starkest within *N. giraulti*, and  
265 that *N. longicornis* displays phenotypes intermediate between the other two species, in contrast  
266 to what was previously reported (Darling and Werren 1990; Werren *et al.* 2010).

267

### 268 **Developmental incompatibility alleles more strongly associated with temporal, rather** 269 **than morphological divergence**

270         Understanding the genetic basis of morphological divergences can provide insight to  
271 how morphology evolves. One question that needs to be addressed is whether the genetic basis  
272 of developmental defects in F2 hybrids between *Nv* and *Ng* are caused by negative interactions  
273 among alleles involved in producing the divergent head shapes. One could imagine that alleles  
274 important for making the exaggerated traits may contribute to tissue behavior incompatible with  
275 the effects of alleles driving the formation of elongate, ovoid head of *Nv*. Similarly, alleles  
276 required to produce the novel *Ng* cheeks may have unexpected interactions with alleles of the  
277 cheek-less *Nv*. On the other hand, the F2 hybrid male head defects could occur due to  
278 interactions among divergent alleles that have changed due to forces other than morphological

279 evolution of the head, such as random drift over the course of the 1.4-1.6 million years of  
280 independent evolution since these species shared a common ancestor.

281 To differentiate between these possibilities, we examined F2 hybrid males created with  
282 *N. longicornis* (*Nl*). *Nl* is a sister species to *N. giraulti*, from which it diverged ~0.4 - 0.56 million  
283 years ago (mya). The divergence time between *Nl* and *Nv* is identical to that between *Ng* and  
284 *Nv* (~1.4 million years). We have found that, while male *Nl* heads are significantly less square,  
285 and have significantly smaller cheeks (Figures 1 and 2, Table S1) than *Ng* males, they are also  
286 statistically significantly different from *Nv* in these measures (Figures 1 and 2, Table S1). Thus,  
287 divergence time is not completely uncoupled from morphological evolution in this experiment.  
288 However, the timing of the origin of the negative interactions leading to developmental defects  
289 can still be inferred as could a potential influence of the exaggerated morphological differences  
290 in *Ng* relative to *Nv*.

291 Eighty-eight percent of F2 males produced by *N. giraulti* x *N. vitripennis* (*Ng-Nv*) hybrid  
292 females show head defects of some type, while 80% of F2 hybrid males resulting from *N.*  
293 *longicornis* x *N. vitripennis* hybrids (*Nl-Nv*) exhibit head defects (Figure 3A). These defects took  
294 many forms, with some co-occurring in the same individual. Lateral asymmetry indicates a  
295 difference in relative size between the left and right sides of the head (Figure 3B, compare  
296 arrows), or misplacement of ocelli (Figure 4A). Individuals with a cleft phenotype display a  
297 furrow among the midline of the face (Figure 3B' arrowhead). In wild type wasps, the point at  
298 which the eye meets the epidermis at the top of the head is directly above the point where the  
299 eye meets the epidermis at the bottom of the head (Figure 1D-D'). When this is not the case in  
300 hybrid individuals it is referred to as dorso-ventral (DV) asymmetry (Figure 3B', compare  
301 arrows), which can occur in one or both eyes. Abnormalities that account for less than five  
302 percent of the hybrid population are grouped under "miscellaneous." These include swollen  
303 head syndrome, an expansion at the top of the head (Figure 3B''); bulging eye syndrome, where  
304 the eye field is larger than average causing the facial area to be smaller than average; pitting

305 around the antennal sockets; and presence of a fourth ocellus. Some individuals display more  
306 than one type of abnormality, which are noted under “multi” in Figure 3A. In contrast to the high  
307 rate and diversity of head defects in the *Nl-Nv* and *Ng-Nv* F2 male hybrids, observable head  
308 defects are seen in only ~20% of the F2 *N. longicornis* x *N. giraulti* (*Nl-Ng*) hybrids (Figure 3A).  
309 Strikingly, the clefting phenotype was completely absent and both DV and lateral asymmetries  
310 only occurred in five percent of hybrids (compared to ~25% and 20% in hybrids involving *Nv*,  
311 respectively, Table 1). Miscellaneous defects accounted for 10% of abnormal heads in *Nl-Ng* F2  
312 hybrid males (compared to 18-24% in *Nv* hybrids, Table 1) and no individuals of this cross had  
313 more than one defect (compared to 10-12% of *Nv* hybrids, Table 1).

314 In summary, it appears that most of the alleles causing developmental defects in the  
315 heads of hybrids between *N. vitripennis* and *N. longicornis* or *N. giraulti* arose and were fixed  
316 prior to the divergence of the *N. giraulti* and *N. longicornis* lineages from each other ~ 400k-  
317 500k years ago (Campbell *et al.* 1993; Martinson *et al.* 2017). This indicates that exaggeration  
318 of morphological differences in *N. giraulti* males had little effect on the evolution of  
319 developmental incompatibility between *N. giraulti* and *N. vitripennis*. The low frequency of  
320 defects seen in *Nl-Ng* hybrids may be due to new alleles that have arisen in one or both  
321 lineages, or may reflect independent sorting of polymorphisms present in the ancestral  
322 population that gave rise to them.

323

### 324 **Asymmetric hybrid phenotypes are specific to the head**

325 The most common of the abnormal hybrid phenotypes is asymmetry (Figure 3A). We  
326 wanted to know the extent of these asymmetries and whether they are caused by a general  
327 developmental instability in the hybrids, as is often seen in some systems (Alibert and Auffray  
328 2003; Leamy and Klingenberg 2005), or if the phenotype has its basis in genetic mechanisms  
329 operating specifically in the head. To determine this, we developed an approach to quantify  
330 asymmetry among head capsules as well as difference in length at two other body parts: legs

331 and wings (Figure 4E). Symmetry between left and right sides of heads was quantified using R  
332 package *vegan* (Oksanen *et al.* 2017), wherein landmarks from the left are overlaid to their  
333 corresponding landmarks on the right (ie, the wireframe is folded along the centerline) and a  
334 Procrustes distance analyses is performed by calculating  $\Sigma((\text{distance between corresponding}$   
335  $\text{landmarks})^2)$ . A Procrustes distance analysis (Figure 4A-C) done on 105 *Nv* x *Ng* hybrid heads  
336 found that a hybrid head has only 93% correlation on average between its left and right sides  
337 (Figure 4D). On the other hand, wild type heads measured from both males and females of *N.*  
338 *vitripennis* and *N. giraulti* revealed a 99.5% correlation between left and right sides of the head.  
339 The differences in correlation are highly statistically significant ( $P < 0.001$ ), indicating a strong  
340 effect of the hybrid genome on the maintenance of tissue homeostasis. However, we found no  
341 significant difference in the length between the left and right T1 legs, nor between the first pair  
342 of wings in the same set of F2 hybrid wasps, as compared to either parental species (Figure 4E,  
343 Table S2). We therefore conclude that generalized developmental instability is not a likely  
344 explanation for cranial asymmetry, since we do not observe defects or asymmetries in other  
345 body parts. Rather, there appears to be phenomenon specific to the head patterning and  
346 homeostasis system.

347

348 **Alleles causing head defects are recessive whereas alleles governing head shape are**  
349 **codominant**

350 Due to the obligate haplodiploidy, hymenopterans such as *Nasonia*, males are normally  
351 hemizygous and interactions among alleles can be assessed in the absence of dominance  
352 effects. However, understanding the dominance relationships of alleles is helpful in  
353 understanding both the function of the genes involved in generating a phenotype, and the  
354 molecular nature of interactions that lead to changes or failure in development.

355 To study the dominance relationships between the two parental genomes while  
356 maintaining male-specific traits, we created diploid males using the previously described



357 method of knocking down the maternal *Nv-tra* contribution by pRNAi. In the absence of maternal  
358 *Nv-tra*, mated females will produce diploid males (Verhulst *et al.* 2010; Beukeboom *et al.* 2015),  
359 *Nv-tra* dsRNA injected *Nv* females were mated to *Ng* males, which resulted in diploid, hybrid  
360 male, offspring (Figure 5C). Since these offspring are F1 hybrids where not genetic  
361 recombination or assortment has taken place, and there are no sex-based chromosomal  
362 differences in these species, they receive an equal contribution genetic material from each  
363 parental species (along with the lack of sex chromosomes in this system). Interestingly, we  
364 found that for almost all traits, the phenotype for these diploid hybrid males was nearly exactly  
365 intermediate between, and significantly different from, both of the parental species (Figure 5A-C,  
366 Figure 6, Table S3). Minor deviations from this pattern were at OIO measurements which were  
367 closer to those of *N. vitripennis*, while MHW and AIO were more similar to that of *N. giraulti*  
368 (Figure 6, Table S3).

369         These results indicate that alleles of genes involved in regulating the size and shape of  
370 the head are codominant, leading to hybrids with intermediate traits. Additionally, diploid males  
371 did not display any of the anomalous phenotypes that occur in haploid hybrids, indicating that it  
372 is not the mere presence of an allele from the other species that causes the incompatibility.  
373 Rather, it appears that there are species specific alleles that can only function with alleles at  
374 other loci that are derived from the same species, and it is the absence of the compatible alleles  
375 that leads to defects in the hybrid F2 males between *Nv* and *Ng*. In other words, hybrid head  
376 defects involve recessive interaction among loci from the two species.

377

### 378 **Doublesex knockdown in *N. giraulti* males generate a reduced cheek phenotype**

379         Since the divergent head morphology in *N. giraulti* is a specific novelty in the males (the  
380 females are barely distinguishable from other *Nasonia* species females), we hypothesized that  
381 effectors of the sex determination system may play an important role in generating the divergent  
382 features of the *N. giraulti* male head. To test this, we examined the involvement of *doublesex*

383 (*dsx*) in craniofacial development in *N. giraulti*. *Dsx* is the main effector gene of the sex  
384 determination pathway, and it is known to play specific roles in the evolution of developmental  
385 traits that vary between sexes (Hediger *et al.* 2004; Verhulst *et al.* 2010; Tanaka *et al.* 2011; Ito  
386 *et al.* 2013), including sex specific differences in wing size between *Nv* and *Ng* (Loehlin *et al.*  
387 2010). We therefore hypothesized that it would play a role in generating the sex specific  
388 features of the *N. giraulti* male head. Larval RNAi (Werren *et al.* 2009) was used to knock down  
389 *N. giraulti doublesex* (*Ng-dsx*) in male (progeny of virgin females) late-stage larvae before the  
390 main period of growth and patterning of the eye and antennal imaginal discs commenced.

391 Compared to wild type *N. giraulti* males, the divergent *N. giraulti* features of the male  
392 were significantly reduced by *Ng-dsx* knockdown, (Figure 5D, Figure 6B-E, Table S3). MIO and  
393 cheek size (FEP/FE) were significantly different from both wild-type *Ng* ( $p < 0.01$  and  $0.05$ ,  
394 respectively) and wt *Nv* (both  $p < 0.01$ ) after *Ng-dsx* RNAi. OIO and AIO were strongly different  
395 from wt *Ng* ( $p < 0.01$ ), but were statistically indistinguishable from *Nv* males, indicating that these  
396 features are strongly influenced by *Ng-dsx*. (Figure 6, Table S3). From these results we can  
397 conclude that *Ng-dsx* plays an important role in producing the lineages specific male traits in  
398 *Ng*. It is possible that female form is the default, and genes that determine male sex also cause  
399 the male-specific facial morphology. However, the *Ng-dsx* RNAi strain was still significantly  
400 different from *Ng* females at MHW, MIO and cheek size (Table S4), indicating there was not a  
401 complete transformation to the female phenotype, and we can conclude that *dsx* likely works  
402 alongside many other genes to generate the male form.

403

#### 404 **Introgression of *N. giraulti dsx* non-coding region increases cheek size:**

405 The role of *Ng-dsx* in generating the *N. giraulti* male specific structures was further  
406 tested by taking advantage of an introgression line containing a portion of the regulatory region  
407 of *Ng-dsx* isolated in the background of *N. vitripennis* (Figure 5D). This introgression was  
408 originally identified as a region important for the larger size of the *Ng* male wing (Loehlin *et al.*

409 2010). This relatively small introgression (~40kb) containing only DNA in the non-coding region  
410 upstream of the transcription start site of *Ng-dsx* has a strong effect on the shape of the male  
411 head in an *N. vitripennis* background. For all five measures examined, the introgression line  
412 showed highly statistically significant difference to normal *Nv* male values ( $p < 0.01$  for all values,  
413 Table S3). Additionally, the introgression line was not statistically significant from normal *Ng*  
414 males at MHW and OIO, which is consistent with our hypothesis that *dsx* plays a crucial role in  
415 generating the *N. giraulti* specific male head shape features.

416         Since this introgression line also shows significant differences in shape also from *N.*  
417 *giraulti* (Figure 5E, Figure 6), it is clear that other factors are involved. It is likely that multiple loci  
418 contribute significantly to the head shape differences, as seen for the wing size and shape  
419 network differences between these two species (Gadau *et al.* 2002). Indeed, complex genetic  
420 bases for all of the differing male head shape and size features were predicted in our previous  
421 quantitative trait locus analysis (Werren *et al.* 2016). That being said, we cannot exclude that *Ng-*  
422 *dsx* plays a larger role than that detected here. We do not know exactly how *Nv-dsx* expression  
423 is being affected in the head, and there may be additional enhancers not included in the  
424 introgressed region that are important for additional aspects of *dsx* expression divergence  
425 between the species.

426

#### 427 **Introgression of incompatible loci lends insight to abnormal clefting phenotype**

428 As shown above (and previously in Li *et al.* 2005; Loehlin *et al.* 2010; Loehlin and Werren 2012;  
429 Hoedjes *et al.* 2014), introgression of genomic regions from one species' background into  
430 another is a powerful method to analyze the genetic basis of evolutionary traits in *Nasonia*.  
431 Previous QTL analyses for clefting showed a complex web of genetic interaction among regions  
432 on chromosomes 2, 4 and 5 (Werren *et al.* 2016). Briefly, clefting occurs at frequency of ~25%  
433 when either or both the regions on Chr 2 and Chr 4 have the *N. giraulti* genotype AND the  
434 region on Chr 5 has the *N. vitripennis* genotype. If Chr 5 has the *N. giraulti* genotype, clefting is

435 completely suppressed, unless both the Chr2 and Chr 4 region derives from *N. vitripennis*.  
436 Clefing also occurs at about 25% of the time when all three regions derive from *N. vitripennis*,  
437 indicating that at least one more locus is involved, or that there is an effect of the general hybrid  
438 background on the threshold for clefing.

439 To simplify analysis of this trait, we examined existing introgression lines with segments  
440 of *Ng* DNA introgressed in a *Nv* background. One line, derived from a larger introgression  
441 spanning the centromere of chromosome 2 consistently showed facial clefing (See Methods,  
442 Figure 5F). Significantly, the females homozygous for this introgression also display the cleft  
443 phenotype, unlike F1 hybrid females that never show abnormalities. This shows that the  
444 interactions leading to the epistatic phenotype are recessive, since the introgression lines are  
445 homozygous and are not seen in the F1 females. The result is consistent with the F2 clefing  
446 QTL analysis which predicts that the *Ng* allele in chromosome 2 will induce clefing when  
447 combined with the *Nv* alleles at the locus on chromosome 4 or 5 (Werren *et al.* 2016). This  
448 result also indicates that the clefing trait is not directly related to the sex specific morphological  
449 divergence between the species, and is rather a general defect in head patterning. Finally, this  
450 introgression importantly shows that, at least for the locus on chromosome 2, the clefing trait is  
451 fully penetrant when incompatible alleles are isolated from any suppressing alleles at other loci.  
452 This will simplify identification of the causative allele from *N. giraulti*, and aid in the fine-scale  
453 mapping and positional cloning of suppressing alleles at other loci (e.g. on chromosome 5).

454

455 **Discussion**

456

457 In these experiments, we have demonstrated the use of *Nasonia* genus of parasitic wasps to  
458 explore the genetic basis of shape. Taking advantage of the significant differences in cranial  
459 morphologies among three closely related species and the ability to generate interspecies  
460 hybrids, we are able to begin unraveling the network of gene interactions that govern trait  
461 formation. Both morphology and genetic incompatibility are result of complex epistatic  
462 interactions (Werren *et al.* 2016).

463 Abnormally asymmetric phenotypes, as seen in the hybrid F2 males here, are known as  
464 fluctuating asymmetries, typically caused by developmental instability (Dongen 2006).  
465 Developmental instability can result from any number of genetic or environmental factors,  
466 commonly observed when hybridizing genomes (Leamy and Klingenberg 2005). However, our  
467 system differs from typically cases of fluctuating asymmetry, since we observe stable symmetry  
468 among the rest of the body in hybrid males. This indicates generalized developmental instability  
469 is not likely to be the cause in this case. This indicates that the head asymmetries we observe in  
470 F2 males are not likely to be due to general developmental instability, but rather have a specific  
471 genetic basis in the context of head development. The feasibility of dissecting gene interactions  
472 governing complex head defects using introgression and recombination mapping has already  
473 been shown with our work with the clefting trait, so *Nasonia* is well positioned to make a unique  
474 contribution to understanding the genetic and developmental causes of fluctuating asymmetry.  
475 Sex identity clearly plays an important role in some aspects of the head shape network, at least  
476 in *N. giraulti*. While knockdown of the male-specific spliceoform of *Ng-dsx* does decrease male-  
477 specific morphology, a full transformation to the female form may require the function of the  
478 female specific transcript of *Ng-dsx*. However our results are also consistent with a complex  
479 interplay between sex-specific genes, and developmental factors shared between the sexes in  
480 generating sex specific morphologies. While morphology is strongly influenced by sex, the

481 negative gene interactions that cause developmental defects in F2 hybrid males clearly are not,  
482 since our clefting introgression line shows the phenotype in homozygous females as well as  
483 haploid males.

484 QTL analysis is valuable as a starting point for fine-scale mapping of interacting loci that  
485 are the genetic basis for observed disrupted phenotypes (Gadau *et al.* 1999). Putative causal  
486 regions can be isolated in the other species' genetic background by introgression for further  
487 analysis. Introgression is a very powerful method to understand quantitative traits and gene  
488 interactions, whereby a section of one genome is isolated in the background of another through  
489 a series of backcrosses, and its localized effects examined. Introgression lines are also powerful  
490 starting points for fine scale mapping and positional cloning of causative alleles. The  
491 introgression of the clefting locus on chromosome 2 is a good example of the power of the  
492 introgression approach. Given the complexity of the interactions that govern the appearance of  
493 the cleft in F2 hybrid males, it was somewhat surprising that the introgression of the *N. giraulti*  
494 Chr2 locus led to a completely penetrant phenotype in both males and females, behaving  
495 basically as a Mendelian recessive allele. Thus it appears that while the genetic architecture  
496 preventing clefting in the pure species is complex, each individual allele may have a relatively  
497 simple and robust role, rather than each locus having an unpredictable magnitude of effect on  
498 the phenotype.

499 Future analyses will focus on determining whether the other participating alleles  
500 predicted by the QTL analyses (Werren *et al.* 2016) also have strong effects in a foreign  
501 background, or if there is a mixture of completely, and incompletely, penetrant negative  
502 interactions. In particular, a region on Chr5 interacts with the region from Chr2. Based on the  
503 QTL analysis (Werren *et al.* 2016), we expect an introgression of the Chr 5 region to completely  
504 suppress clefting in combination with the Chr 2 introgression, since clefting occurred 0% of the  
505 time when these two alleles were present together in F2 males used for the QTL analysis. The  
506 expected phenotype of this Chr5 region are less clear, since overall clefting occurred 25% of the

507 time when regions on both Chr 2 and Chr4 had the *N. vitripennis* genotype. (Werren *et al.*  
508 2016). This indicates either that there are other loci that suppress clefting induced by the *N.*  
509 *giraulti* Chr5 allele, or that this allele does not promote clefting in a fully penetrant way.

510 We intend to map these additional interacting loci governing the evolution of morphology  
511 by first using Multiplexed Shotgun Genotyping and QTL analysis to identify genomic segments  
512 associated with the traits of interest (Andolfatto *et al.* 2011). We can then use marker based  
513 introgression and recombination mapping to identify the causative alleles.

514 In crosses between the closely related flies *Drosophila simulans* and *D. mauritiana*  
515 which have divergent head shapes, seemingly coordinated changes in size of the eye field and  
516 facial cuticle were found to be due to separable genomic loci (Arif *et al.* 2013). No complex gene  
517 interactions or developmental defects (such as clefting or asymmetry) were reported. This may  
518 be due to the shorter divergence time between the *Drosophila* species (~250,000 years (ref:  
519 Genome Res. 2012. 22: 1499-1511)) than between *N. vitripennis* and *N. giraulti* (~1 million  
520 years). Our results are consistent with the appearance of negative epistatic interactions  
521 between isolated species being correlated with increased time since divergence, since we do  
522 not observe these effects in hybrids of closely related species *N. longicornis* and *N. giraulti*.  
523 Future analysis of the genetic architecture of the morphological difference between *N.*  
524 *longicornis* and *N. giraulti* also have more simple genetic bases, like those observed between *D.*  
525 *simulans* and *D. mauritiana*, or whether epistasis plays an important role already in more  
526 recently diversified species of *Nasonia*.

527 In conclusion, our results have demonstrated important roles of sex, ploidy, and  
528 divergence time in the evolution of novel morphologies and developmental defects in hybrids. In  
529 addition, our introgression of an allele from one species that causes a severe developmental  
530 defect in the genomic background of its close relative is an important step in simplifying an  
531 understanding of the still daunting task of characterizing gene interactions involved in head  
532 development and developmental abnormalities. The powerful genetic tools available in *Nasonia*

533 wasp combined with the rich, complex genetic architectures of the head shape differences and  
534 developmental defects, will make these parasitoids excellent models for charting the  
535 connections between genomic and phenotypic variation.

536

## 537 **Figure Legends**

538

539 **Figure 1. Shape differences among wild type species.** A-C') Representative images of wasp  
540 heads. D-D') Procrustes superimposition of average wild type head shapes based on 16  
541 landmarks. Morphology recapitulated by wireframe diagram. A) *N. vitripennis* male, A') *N.*  
542 *vitripennis* female, B) *N. giraulti* male, B') *N. giraulti* female, C) *N. longicornis* male, C') *N.*  
543 *longicornis* female, D) Superimposed wireframe diagrams of male heads D') Superimposed  
544 wireframe diagrams of female heads. Yellow landmarks denote *N. vitripennis*, green *N. giraulti*,  
545 and blue *N. longicornis*.

546

547

548 **Figure 2. Measurement ratios of each parent species presented as box and whisker plots.**  
549 Each dot represents a single individual, a box represents the inter-quartile range, the center line  
550 represents the median value and vertical lines represent upper and lower quartile ranges. A)  
551 Maximum head width over head length (MHW/HL), B) Interocular width at ocelli over head  
552 length (OIO/HL), C) Maximum interocular width over head length (MIO/HL), D) Interocular  
553 width at antennae over head length (AIO/HL), E) Cheek size (FEP/FE.) Males are shown in  
554 yellow and females in blue. Comparisons were made among males of each species, among  
555 females of each species, and between males and females within each species. Asterisks  
556 indicate  $P < 0.05$ .

557

558 **Figure 3. Representative hybrid head shapes from *N. longicornis* crosses.** A) Table  
559 containing percentages of hybrid offspring that display each category of facial defect for the  
560 three hybrid crosses. The first three categories are facial clefting, dorsoventral asymmetry, and  
561 lateral asymmetry. Individuals displaying more than one type of defect are noted under Multi.  
562 Miscellaneous defects include swollen head syndrome, bulging eye syndrome, and antennal  
563 pits. B-B'') *N. longicornis* x *N. vitripennis* hybrids. B) Lateral asymmetry, arrows points to  
564 difference in cheek size. B') DV asymmetry and midline cleft, double-ended arrows indicate  
565 change in width of eye field from dorsal to ventral side of the head. Arrowhead points to midline  
566 cleft. B'') Swollen head syndrome, the top of the head bulges outward. C) *N. longicornis* x *N.*  
567 *giraulti* hybrid. Note no obvious aberrations.

568

569 **Figure 4. Symmetry analyses.** A) Representative asymmetric hybrid head. B) Wireframe  
570 diagram of head in (A). C) Right-side landmarks reflected over left side landmarks. Reflection is  
571 shown in red. A black line represents distance between corresponding landmarks. Procrustes  
572 distance is calculated as the sum of the squares of each distance. D) Scatter plot in which each  
573 dot depicts Procrustes distance for individual wasps. Dark blue dots represent hybrid



574 individuals; yellow, green and light blue are wild types.  $P < 0.001$  between hybrids and wild types.  
575 E) Box Plot graphing differences in length of T1 legs and first set of wings in the same wild type  
576 and hybrid wasps as panel (D). ANOVA analysis reveals no significant asymmetry in legs and  
577 wings. ( $P = 0.28$  among legs and  $P = 0.65$  among wings).

578

579 **Figure 5. Experimental hybrid head shapes.** A) Wild type *N. vitripennis* male B) Wild type *N.*  
580 *giraulti* male, C) Diploid male, D) *N.g. dsx* knockdown, E) Introgression on chromosome 2, F)  
581 Introgression on chromosome 4, arrowhead points to midline cleft. Note no other obvious  
582 asymmetries or abnormalities.

583

584 **Figure 6. Measurement ratios of RNAi and introgression experiments, presented as box**  
585 **and whisker plots.** Each dot represents a single individual, a box represents the inter-quartile  
586 range, the center line represents the median value and vertical lines represent upper and lower  
587 quartile ranges. A) Maximum head width over head length (MHW/HL), B) Interocular width at  
588 ocelli over head length (OIO/HL), C) Maximum interocular width over head length (MIO/HL),  
589 D) Interocular width at antennae over head length (AIO/HL), E) Cheek size (FEP/FE). Wild  
590 type *N. vitripennis* and *N. giraulti* males are shown in yellow and experimental lines in varying  
591 shades of blue. Each experimental group was compared to both wild type groups. Asterisks  
592 indicate  $P < 0.05$ .

593

594

595

596

597

598 **Literature Cited**

- 599 Adams D. C., Collyer M. L., Kaliontzopoulou A., Sherratt E., 2017 Geomorph: Software for  
600 geometric morphometric analyses. R package version 3.0.5. [https://cran.r-](https://cran.r-project.org/package=geomorph)  
601 [project.org/package=geomorph](https://cran.r-project.org/package=geomorph).
- 602 Alibert P., Auffray J.-C., 2003 Genomic coadaptation, outbreeding depression, and  
603 developmental instability. In: *Developmental Instability: Causes and Consequences*, Oxford  
604 University Press, pp. 116–134.
- 605 Andolfatto P., Davison D., Erezyilmaz D., Hu T. T., Mast J., *et al.*, 2011 Multiplexed shotgun  
606 genotyping for rapid and efficient genetic mapping. *Genome Res.* 21: 610–7.
- 607 Arif S., Hilbrant M., Hopfen C., Almudi I., Nunes M. D. S., *et al.*, 2013 Genetic and  
608 developmental analysis of differences in eye and face morphology between *Drosophila*  
609 *simulans* and *Drosophila mauritiana*. *Evol. Dev.* 15: 257–267.
- 610 Arsala D., Lynch J. A., 2017 Ploidy has little effect on timing early embryonic events in the  
611 haplo-diploid wasp *Nasonia*. *genesis* 55: e23029.
- 612 Avery L., Wasserman S., 1992 Ordering gene function: the interpretation of epistasis in  
613 regulatory hierarchies. *Trends Genet.* 8: 312–316.
- 614 Beukeboom L., Desplan C., 2003 *Nasonia*. *Curr. Biol.* 13: R860.
- 615 Beukeboom L. W., Koevoets T., Morales H. E., Ferber S., Zande L. van de, 2015 Hybrid  
616 incompatibilities are affected by dominance and dosage in the haplodiploid wasp *Nasonia*.  
617 *Front. Genet.* 6: 140.
- 618 Bonhomme V., Picq S., Gaucherel C., Claude J., 2014 Momocs: Outline Analysis Using R. *J.*  
619 *Stat. Softw.* 56: 1–24.
- 620 Breeuwer J. A. J., Werren J. H., 1995 Hybrid Breakdown between Two Haplodiploid Species :  
621 The Role of Nuclear and Cytoplasmic Genes. *Evolution (N. Y.)*. 49: 705–717.
- 622 Campbell B. C., Steffen-Campbell J. D., Werren J. H., 1993 Phylogeny of the *Nasonia* species

- 623 complex (Hymenoptera: Pteromalidae) inferred from an internal transcribed spacer (ITS2)  
624 and 28S rDNA sequences. *Insect Mol. Biol.* 2: 225–37.
- 625 Carlborg Ö., Haley C. S., 2004 Epistasis: too often neglected in complex trait studies? *Nat. Rev.*  
626 *Genet.* 5: 618–625.
- 627 Cheverud J. M., Routman E. J., 1995 Epistasis and its contribution to genetic variance  
628 components. *Genetics* 139: 1455–61.
- 629 Darling D. C., Werren J. H., 1990 Biosystematics of *Nasonia* (Hymenoptera: Pteromalidae): Two  
630 New Species Reared from Birds Nests in North America. *Ann. Entomol. Soc. Am.* 83: 352–  
631 370.
- 632 Davidson E. H., McClay D. R., Hood L., 2003 Regulatory gene networks and the properties of  
633 the developmental process. *Proc. Natl. Acad. Sci. U. S. A.* 100: 1475–80.
- 634 Desjardins C. a., Gadau J., Lopez J. a., Niehuis O., Avery a. R., *et al.*, 2013 Fine-Scale  
635 Mapping of the *Nasonia* Genome to Chromosomes Using a High-Density Genotyping  
636 Microarray. *G3&#58; Genes|Genomes|Genetics* 3: 205–215.
- 637 Domínguez M., Casares F., 2005 Organ specification-growth control connection: new in-sights  
638 from the *Drosophila* eye-antennal disc. *Dev. Dyn.* 232: 673–84.
- 639 Dongen S. V., 2006 Fluctuating asymmetry and developmental instability in evolutionary  
640 biology: past, present and future. *J. Evol. Biol.* 19: 1727–1743.
- 641 Dryden I. L., 2017 shapes: Statistical Shape Analysis.
- 642 Gadau J., Page R. E., Werren J. H., 1999 Mapping of Hybrid Incompatibility Loci in *Nasonia*.  
643 *Genetics*: 1731–1741.
- 644 Gadau J., Page R. E., Werren J. H., 2002 The Genetic Basis of the Interspecific Differences in  
645 Wing Size in *Nasonia* (Hymenoptera; Pteromalidae): Major Quantitative Trait Loci and  
646 Epistasis. *Genetics* 161: 673–684.
- 647 Gross J. B., Krutzler a. J., Carlson B. M., 2014 Complex Craniofacial Changes in Blind Cave-  
648 Dwelling Fish Are Mediated by Genetically Symmetric and Asymmetric Loci. *Genetics* 196:

- 649 1303–1319.
- 650 Hediger M., Burghardt G., Siegenthaler C., Buser N., Hilfiker-Kleiner D., *et al.*, 2004 Sex  
651 determination in *Drosophila melanogaster* and *Musca domestica* converges at the level of  
652 the terminal regulator doublesex. *Dev. Genes Evol.* 214: 29–42.
- 653 Hill W. G., Goddard M. E., Visscher P. M., 2008 Data and Theory Point to Mainly Additive  
654 Genetic Variance for Complex Traits (TFC Mackay, Ed.). *PLoS Genet.* 4: e1000008.
- 655 Hinman V. F., Davidson E. H., 2007 Evolutionary plasticity of developmental gene regulatory  
656 network architecture. *Proc. Natl. Acad. Sci. U. S. A.* 104: 19404–9.
- 657 Hoedjes K. M., Smid H. M., Vet L. E. M., Werren J. H., 2014 Introgression study reveals two  
658 quantitative trait loci involved in interspecific variation in memory retention among *Nasonia*  
659 wasp species. *Heredity (Edinb)*.: 1–9.
- 660 Huang W., Richards S., Carbone M. A., Zhu D., Anholt R. R. H., *et al.*, 2012 Epistasis  
661 dominates the genetic architecture of *Drosophila* quantitative traits. *Proc. Natl. Acad. Sci.*  
662 *U. S. A.* 109: 15553–9.
- 663 Ito Y., Harigai A., Nakata M., Hosoya T., Araya K., *et al.*, 2013 The role of doublesex in the  
664 evolution of exaggerated horns in the Japanese rhinoceros beetle. *EMBO Rep.* 14: 561–7.
- 665 Jones A. G., Bürger R., Arnold S. J., 2014 Epistasis and natural selection shape the mutational  
666 architecture of complex traits. *Nat. Commun.* 5: 3709.
- 667 Leamy L. J., Klingenberg C. P., 2005 The Genetics and Evolution of Fluctuating Asymmetry.  
668 *Annu. Rev. Ecol. Evol. Syst* 36: 1–21.
- 669 Li Z.-K., Fu B.-Y., Gao Y.-M., Xu J.-L., Ali J., *et al.*, 2005 Genome-wide Introgression Lines and  
670 their Use in Genetic and Molecular Dissection of Complex Phenotypes in Rice (*Oryza*  
671 *sativa* L.). *Plant Mol. Biol.* 59: 33–52.
- 672 Lidral A. C., Moreno L. M., 2005 Progress toward discerning the genetics of cleft lip. : 731–739.
- 673 Loehlin D. W., Oliveira D. C. S. G., Edwards R., Giebel J. D., Clark M. E., *et al.*, 2010 Non-  
674 coding changes cause sex-specific wing size differences between closely related species

- 675 of *Nasonia*. *PLoS Genet.* 6.
- 676 Loehlin D. W., Werren J. H., 2012 Evolution of shape by multiple regulatory changes to a growth  
677 gene. *Science* 335: 943–7.
- 678 Lynch J. A., Desplan C., 2006 PROTOCOL A method for parental RNA interference in the wasp  
679 *Nasonia vitripennis*. 1: 486–494.
- 680 Lynch J. a, 2015 The Expanding Genetic Toolbox of the Wasp *Nasonia vitripennis* and Its  
681 Relatives. *Genetics* 199: 897–904.
- 682 Mackay T. F. C., 2014 Epistasis and quantitative traits: using model organisms to study gene–  
683 gene interactions. *Nat. Rev. Genet.* 15: 22–33.
- 684 Martinson E. O., Mrinalini, Kelkar Y. D., Chang C.-H., Werren J. H., 2017 The Evolution of  
685 Venom by Co-option of Single-Copy Genes. *Curr. Biol.* 27: 2007–2013.e8.
- 686 Oksanen J., Blanchet F. G., Friendly M., Kindt R., Legendre P., *et al.*, 2017 vegan: Community  
687 Ecology Package.
- 688 Palliyil S., Zhu J., Baker L. R., Neuman S. D., Bashirullah A., *et al.*, 2018 Allocation of distinct  
689 organ fates from a precursor field requires a shift in expression and function of gene  
690 regulatory networks (PH Taghert, Ed.). *PLOS Genet.* 14: e1007185.
- 691 Phillips P. C., 2008 Epistasis--the essential role of gene interactions in the structure and  
692 evolution of genetic systems. *Nat. Rev. Genet.* 9: 855–67.
- 693 R Core Team, 2013 R: A Language and Environment for Statistical Computing.
- 694 Stathopoulos A., Levine M., 2005 Genomic Regulatory Networks and Animal Development.  
695 *Dev. Cell* 9: 449–462.
- 696 Tanaka K., Barmina O., Sanders L. E., Arbeitman M. N., Kopp A., 2011 Evolution of Sex-  
697 Specific Traits through Changes in HOX-Dependent doublesex Expression (RS Hawley,  
698 Ed.). *PLoS Biol.* 9: e1001131.
- 699 Templeton A. R., Sing C. F., Brokaw B., 1976 The unit of selection in *Drosophila mercatorum*. I.  
700 The interation of selection and meiosis in parthenogenetic strains. *Genetics* 82.

- 701 Verhulst E. C., Beukeboom L. W., Zande L. van de, 2010 Maternal control of haplodiploid sex  
702 determination in the wasp *Nasonia*. *Science* 328: 620–3.
- 703 Werren J. H., Loehlin D. W., Giebel J. D., 2009 Larval RNAi in *Nasonia* (parasitoid wasp). *Cold*  
704 *Spring Harb. Protoc.* 2009: pdb.prot5311.
- 705 Werren J. H., Loehlin D. W., 2009 The parasitoid wasp *Nasonia*: an emerging model system  
706 with haploid male genetics. *Cold Spring Harb. Protoc.* 2009: pdb.emo134.
- 707 Werren J. H., Richards S., Desjardins C. A., Niehuis O., Gadau J., *et al.*, 2010 Functional and  
708 evolutionary insights from the genomes of three parasitoid *Nasonia* species. *Science* 327:  
709 343–348.
- 710 Werren J. H., Cohen L. B., Gadau J., Ponce R., Baudry E., *et al.*, 2016 Dissection of the  
711 complex genetic basis of craniofacial anomalies using haploid genetics and interspecies  
712 hybrids in *Nasonia* wasps. *Dev. Biol.* 415: 391–405.
- 713 Wolf J. B., Leamy L. J., Routman E. J., Cheverud J. M., 2005 Epistatic pleiotropy and the  
714 genetic architecture of covariation within early and late-developing skull trait complexes in  
715 mice. *Genetics* 171: 683–94.
- 716 Younossi-Hartenstein A., Tepass U., Hartenstein V., 1993 Embryonic origin of the imaginal  
717 discs of the head of *Drosophila melanogaster*. *Roux's Arch. Dev. Biol.* 203: 60–73.
- 718

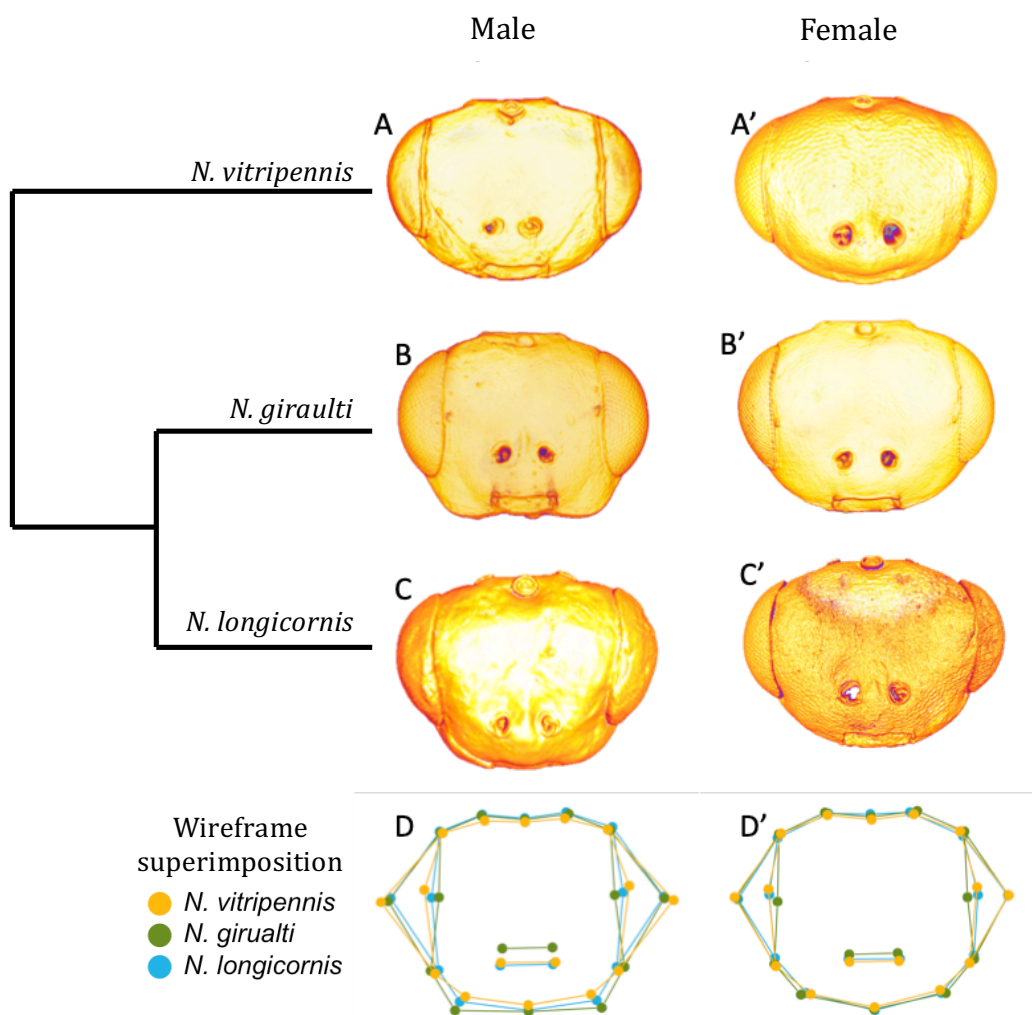

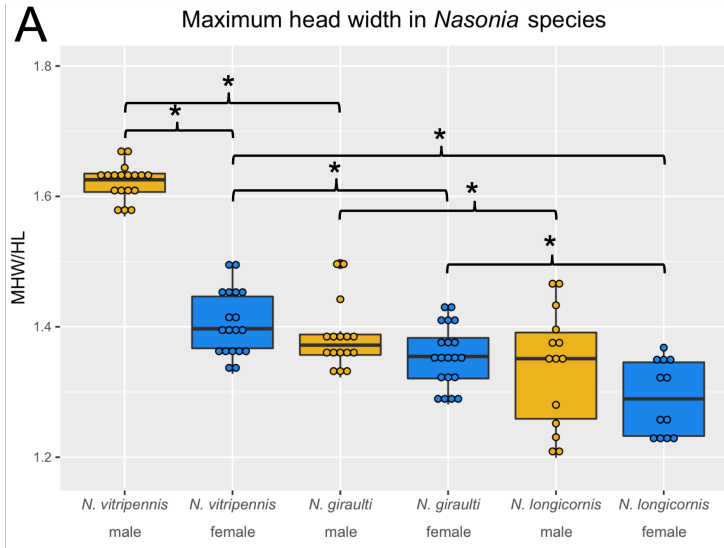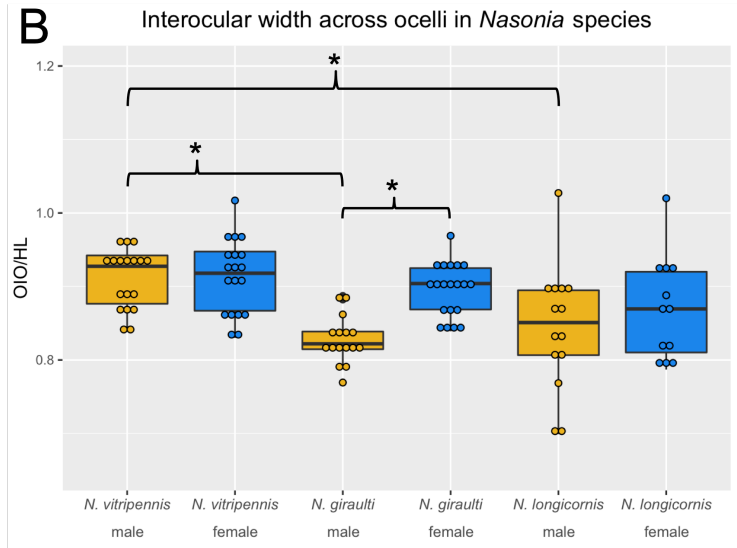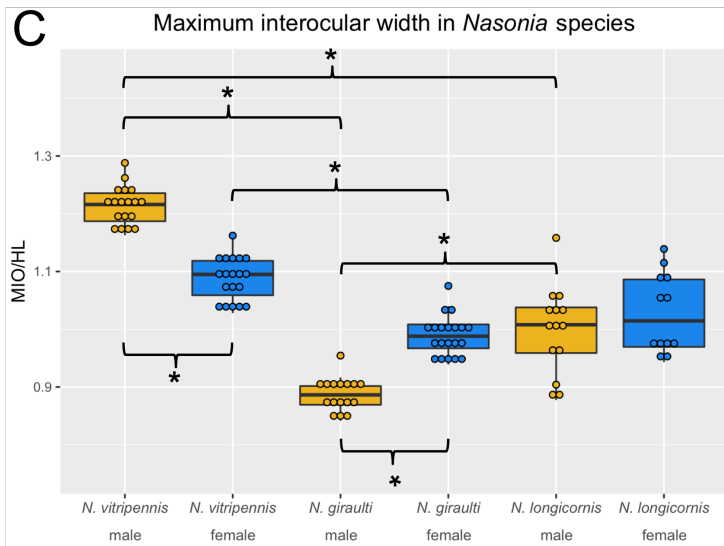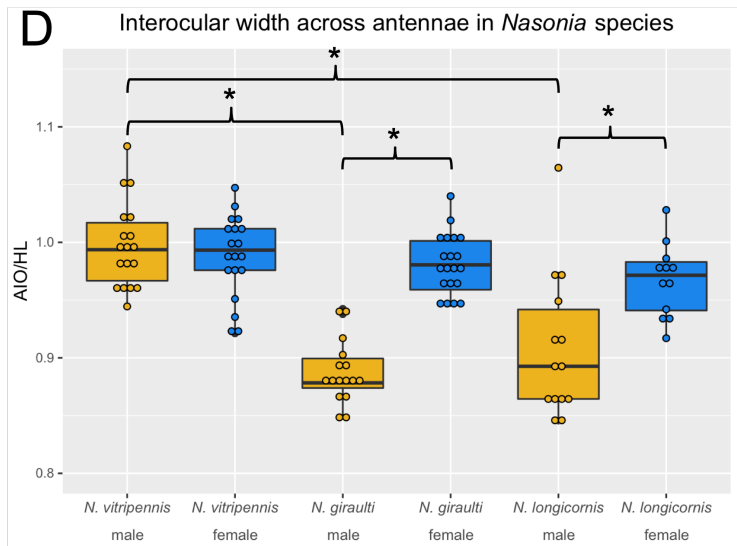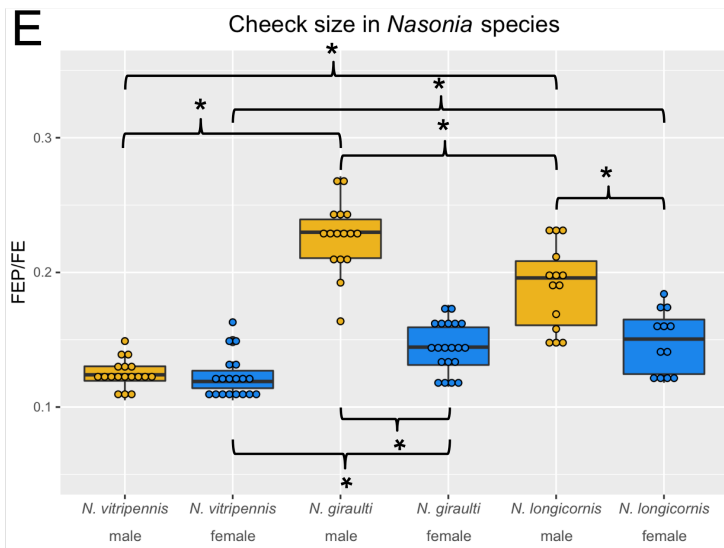



| A       | <i>Ng x Nv</i><br>n=25 | <i>Nl x Nv</i><br>n=25 | <i>Nl x Ng</i><br>n=21 |
|---------|------------------------|------------------------|------------------------|
| Cleft   | .26                    | .24                    | 0                      |
| DV      | .20                    | .20                    | .05                    |
| Lateral | .34                    | .24                    | .05                    |
| Misc.   | .18                    | .24                    | .10                    |
| Multi   | .10                    | .12                    | 0                      |
| Normal  | .12                    | .20                    | .81                    |

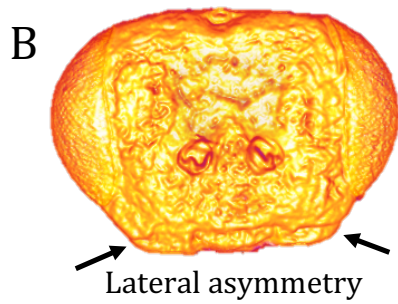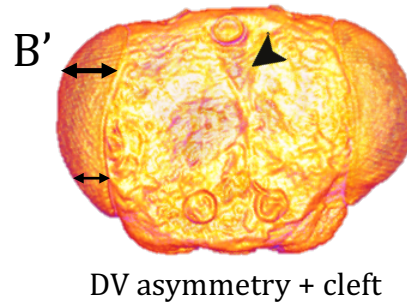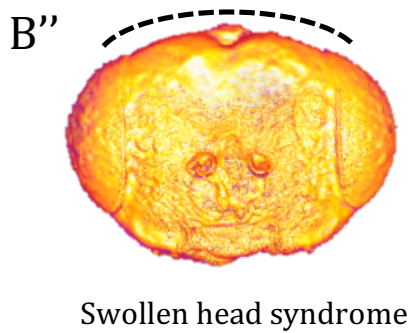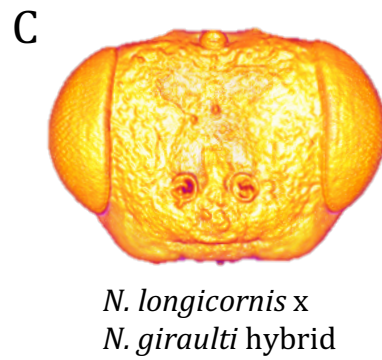

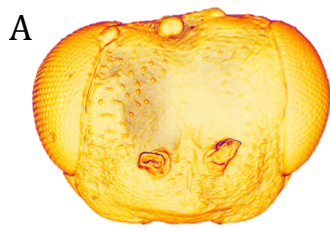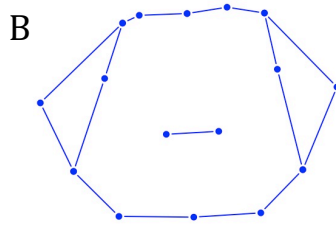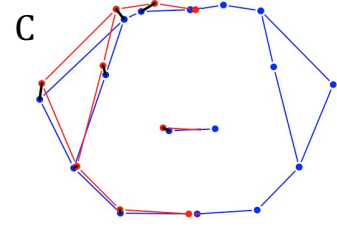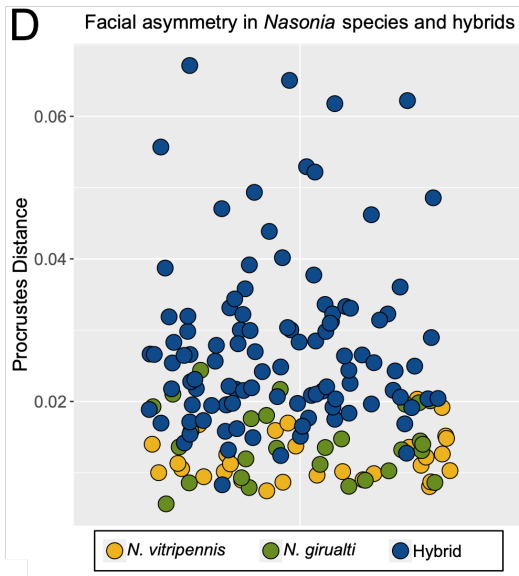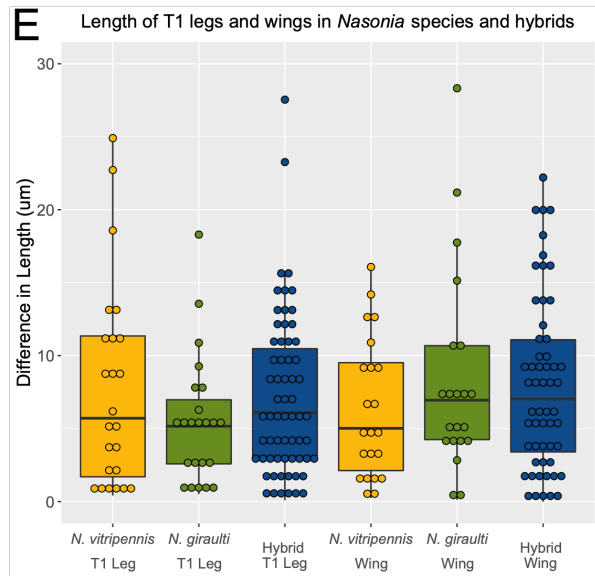

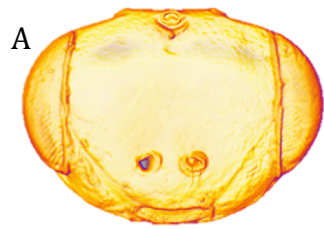

*N. vitripennis* male

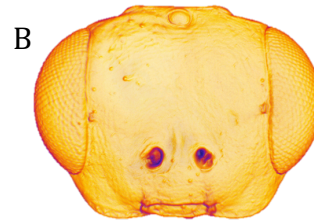

*N. giraulti* male

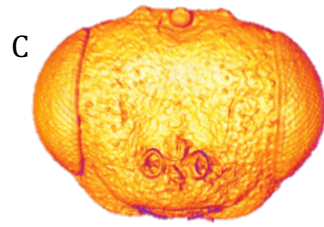

Hybrid Diploid male

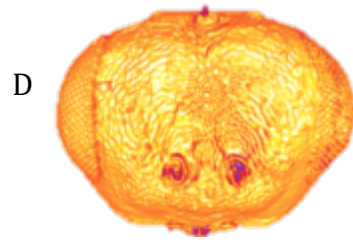

*N.g. dsx* knockdown

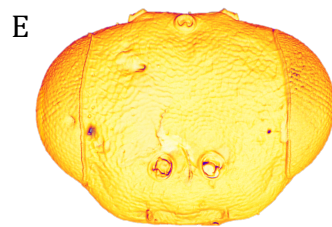

Chr4 introgression

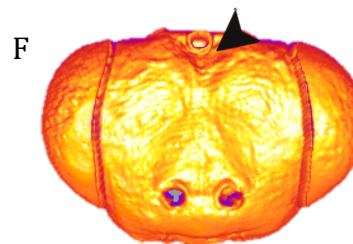

Chr2 introgression

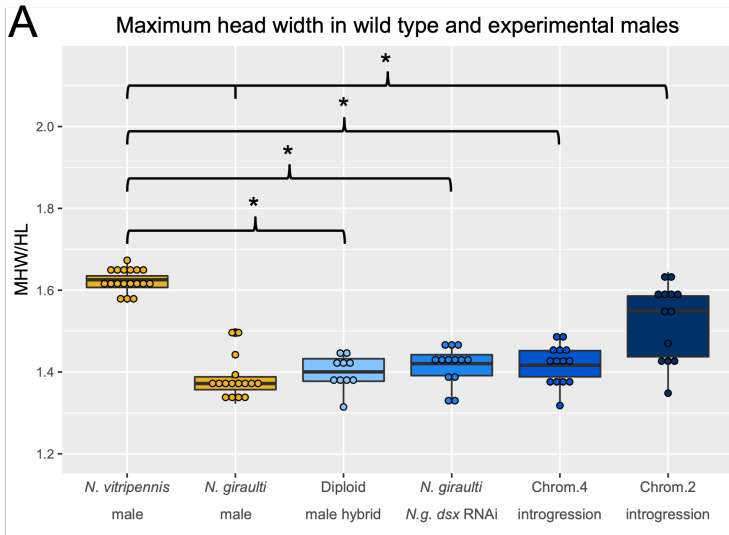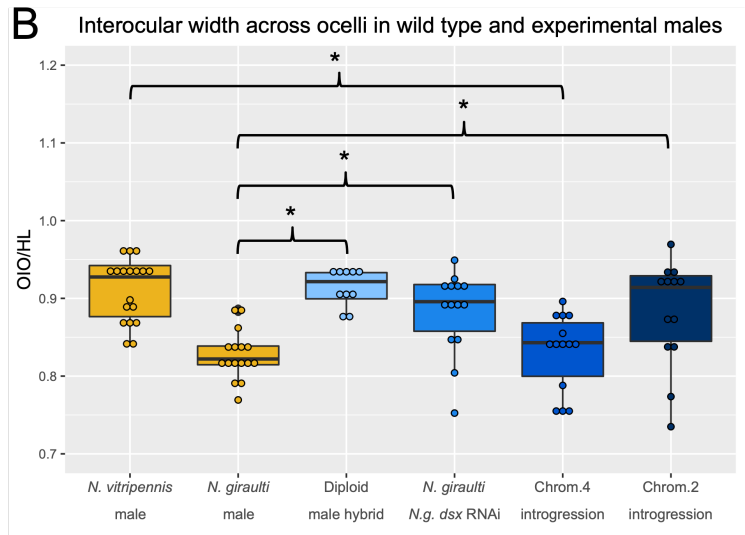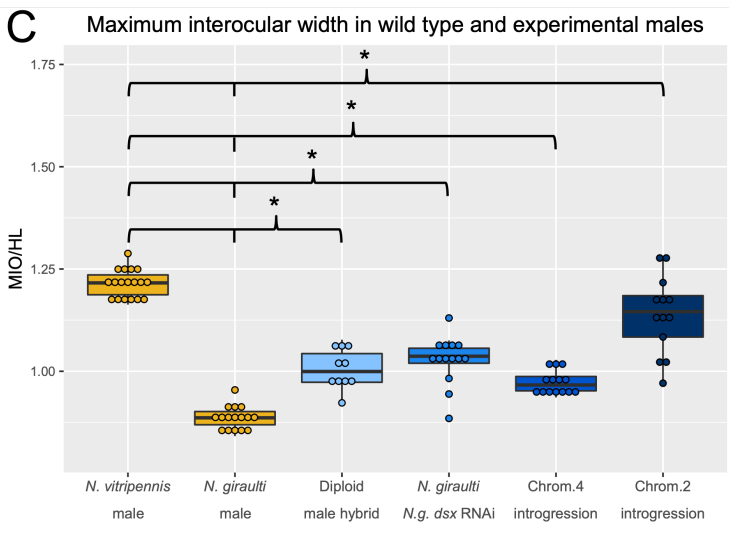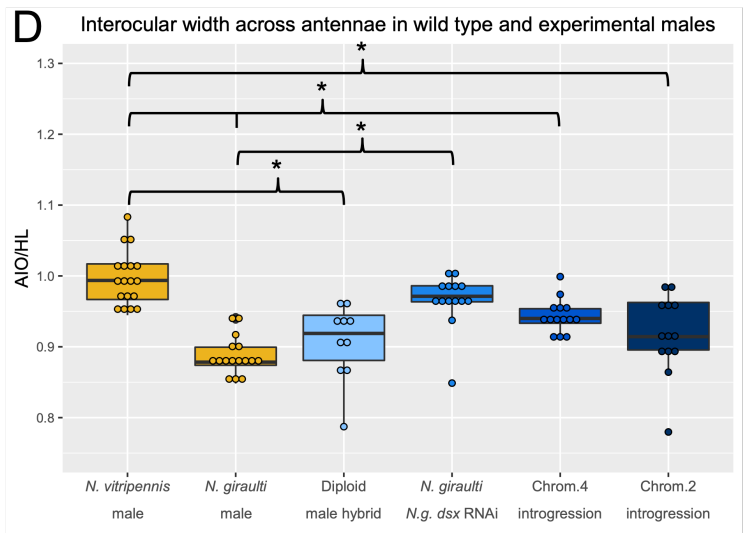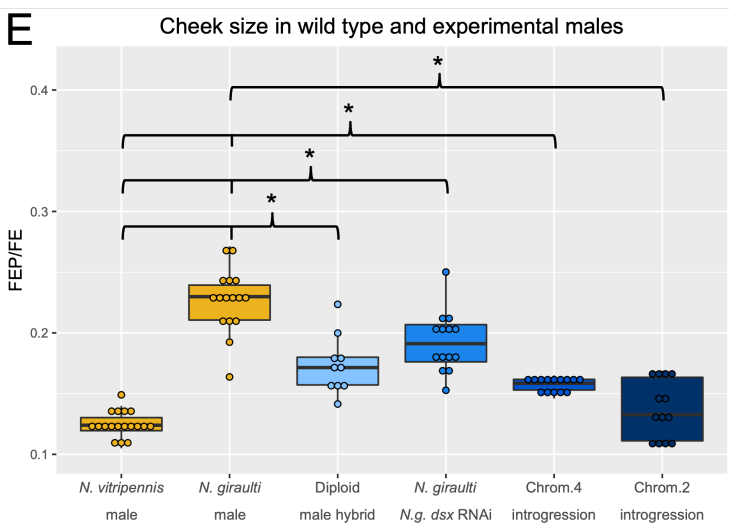

Source: https://www.biorxiv.org/content/10.1101/663732v1.full.pdf
